# Supplementary material for: Confirmation of involvement of new variants at CDKN2A/B in pediatric acute lymphoblastic leukemia susceptibility in the Spanish population
Source: PubMed Central journal article supplement (PMC5421813; doi:10.1371/journal.pone.0177421), 2017-05-08

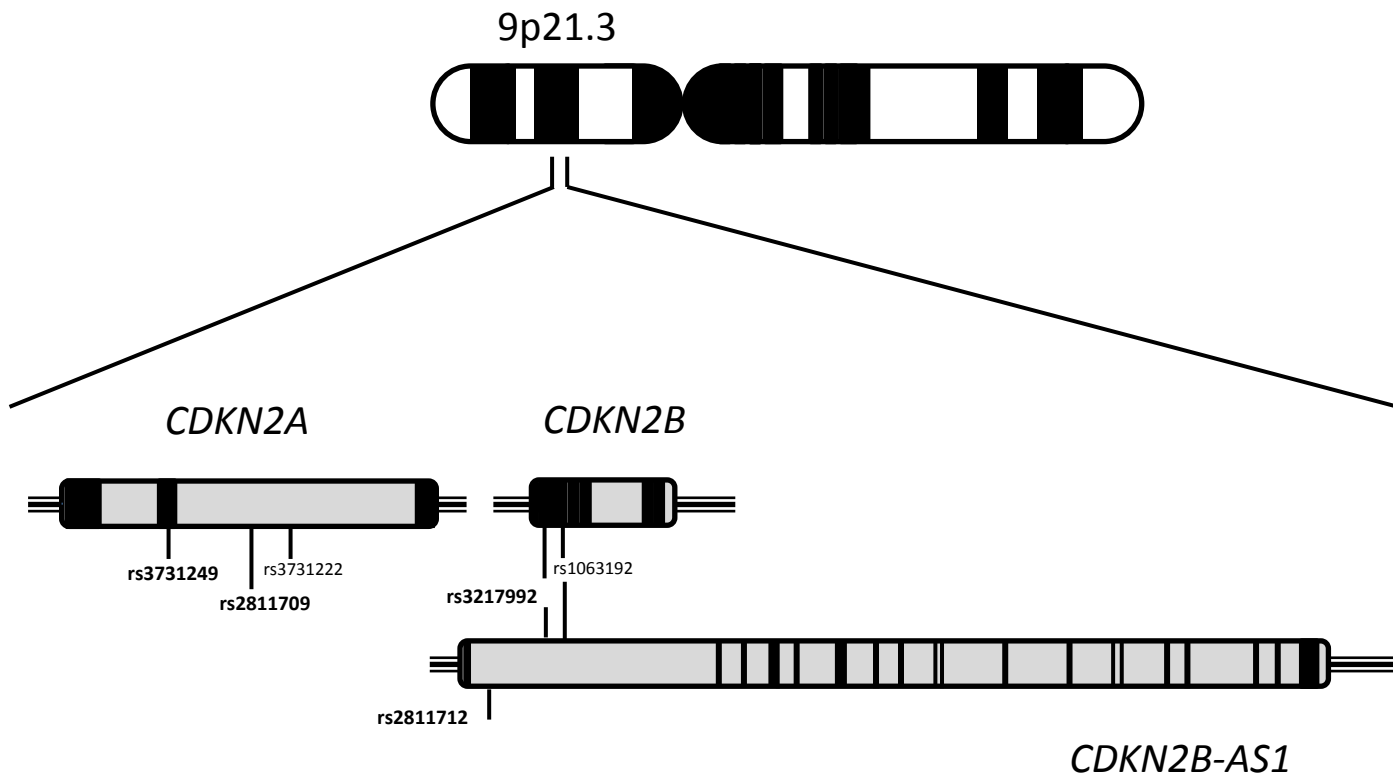

Supplement: pone.0177421.s001.pdf [file pone.0177421.s001.pdf]
