# Supplementary material for: Confirmation of involvement of new variants at CDKN2A/B in pediatric acute lymphoblastic leukemia susceptibility in the Spanish population
Source: PubMed Central journal article supplement (PMC5421813; doi:10.1371/journal.pone.0177421), 2017-05-08
Supplement: pone.0177421.s003.pdf [file pone.0177421.s003.pdf]

S2 Table: Selection of SNPs

| <b>SNP</b>       | <b>Gene</b>          | <b>Alleles</b> | <b>Reason for selection</b>                               |
|------------------|----------------------|----------------|-----------------------------------------------------------|
| <b>rs3731222</b> | <i>CDKN2A</i>        | A>G            | In LD with rs3731217 (Sherborne 2010)                     |
| <b>rs2811709</b> | <i>CDKN2A</i>        | G>A            | Bibliography (Orsi 2012)                                  |
| <b>rs2811712</b> | <i>ANRIL</i>         | A>G            | In LD with rs662463 and rs17756311(Xu 2013, Hungate 2016) |
| <b>rs3731249</b> | <i>CDKN2A</i>        | C>T            | Bibliography (Xu 2015, Walsh 2015, Vijayakrishnan 2015)   |
| <b>rs1063192</b> | <i>CDKN2B, ANRIL</i> | T>C            | 3'UTR miRNA binding site                                  |
| <b>rs3217992</b> | <i>CDKN2B, ANRIL</i> | G>A            | 3'UTR miRNA binding site                                  |
