# Supplementary material for: Confirmation of involvement of new variants at CDKN2A/B in pediatric acute lymphoblastic leukemia susceptibility in the Spanish population
Source: PubMed Central journal article supplement (PMC5421813; doi:10.1371/journal.pone.0177421), 2017-05-08
Supplement: pone.0177421.s004.pdf [file pone.0177421.s004.pdf]

S3 Table: SNPs identified in 3'UTR region of *CDKN2A* and *CDKN2B*

| Gene             | SNP         | Alleles          | MAF      |       |
|------------------|-------------|------------------|----------|-------|
| CDKN2A           | rs111532782 | G>C              | 0.004    |       |
|                  | rs113798404 | -                | -        |       |
|                  | rs121913388 | C>G              | 0.000008 |       |
|                  | rs142371511 | G>C              | -        |       |
|                  | rs145697272 | -                | -        |       |
|                  | rs182558871 | C>A              | 0.001    |       |
|                  | rs190538376 | G>A              | -        |       |
|                  | rs200429615 | T>G              | 0.001    |       |
|                  | rs201314211 | T>G              | -        |       |
|                  | rs34886500  | C>T              | 0.0001   |       |
|                  | rs34968276  | C>A              | 0.0001   |       |
|                  | rs36204273  | G>A              | 0.0001   |       |
|                  | rs3731249   | G>A              | 0.032    |       |
|                  | rs3731253   | C>G              | -        |       |
|                  | rs3731255   | C>G              | -        |       |
|                  | rs4987127   | G>A              | -        |       |
|                  | rs6413463   | T>A              | -        |       |
|                  | rs11552822  | -                | -        |       |
|                  | rs121913383 | -                | -        |       |
|                  | rs121913385 | -                | -        |       |
|                  | rs137854597 | G>A              | 0.000008 |       |
|                  | rs137854599 | -                | -        |       |
|                  | rs181022755 | -                | -        |       |
|                  | rs200863613 | C>A              | -        |       |
|                  | rs3088440   | G>A              | 0.078    |       |
|                  | rs45476696  | -                | -        |       |
|                  | CDKN2B      | <b>rs1063192</b> | T>C      | 0.45  |
|                  |             | rs140726127      | A>G      | -     |
|                  |             | rs148421170      | C>T      | 0.002 |
|                  |             | rs148786939      | T>C      | -     |
|                  |             | rs150924737      | T>A      | 0.001 |
|                  |             | rs181736450      | C>A      | -     |
|                  |             | rs185130567      | T>C      | 0.005 |
| rs187514719      |             | A>G              | 0.001    |       |
| rs200344272      |             | G>A              | -        |       |
| rs2285329        |             | T>C              | -        |       |
| rs3217988        |             | G>A              | -        |       |
| rs62637622       |             | G>A              | -        |       |
| rs111751296      |             | -                | -        |       |
| rs140430251      |             | -                | -        |       |
| rs142570894      |             | C>T              | 0.0003   |       |
| rs144131923      |             | -                | -        |       |
| rs183610933      |             | T>C              | -        |       |
| rs187657501      |             | T>C              | -        |       |
| rs3217983        |             | C>T              | -        |       |
| rs3217990        |             | C>A              | 0.002    |       |
| <b>rs3217992</b> | G>A         | 0.4              |          |       |

SNPs with a MAF>10% are in bold
