# Supplementary material for: Confirmation of involvement of new variants at CDKN2A/B in pediatric acute lymphoblastic leukemia susceptibility in the Spanish population
Source: PubMed Central journal article supplement (PMC5421813; doi:10.1371/journal.pone.0177421), 2017-05-08
Supplement: pone.0177421.s005.pdf [file pone.0177421.s005.pdf]

S4 Table: Primers and PCR conditions for the amplification of rs3731249 in *CDKN2A*

| SNP              | Primer Sequences (5'- 3') | Genotype method | Restriction Enzyme | Fragment length (bp) according to the genotype |
|------------------|---------------------------|-----------------|--------------------|------------------------------------------------|
| <b>rs3731249</b> | F1: GTGGACCTGGCTGAGGAG    | PCR-RFLP        | <i>Bst</i> UI      | GG: 133, 73, 48, 29,21,2                       |
|                  | R1: TCGGGATTATTTCCCATTTG  |                 |                    | AG: 181, 133, 73, 48, 29, 21, 2                |
|                  |                           |                 |                    | AA: 181, 73, 48, 29, 21, 2                     |

SNPs, single nucleotide polymorphisms; PCR, polymerase chain reaction; RFLP, restriction fragment length polymorphism; bp, base pairs.
